# Supplementary material
Source: PubMed Central journal article supplement (PMC3554177)
Supplement: JVI.02079-12_zjv999097216so1.pdf [file JVI.02079-12_zjv999097216so1.pdf]

## Supplemental Material

Supplemental Figure 1: Highlighter analysis of SIV envelope V1-V2 sequences from SIV infected macaque 18993 from the control group. Assessment of this macaque reveals 4 different variants being present within the plasma viral RNA at day 7 following the initial SIV administration (predicted day of SIV infection). The different nucleotide changes are indicated by color; change to an adenine in green, to thymine in red, to guanine in orange, to cytosine in light blue, gaps are in gray, and Apobec related changes guanine to adenine as a red diamond.

# Control macaque—18993

## SGA sequences only

### Sequences compared to master

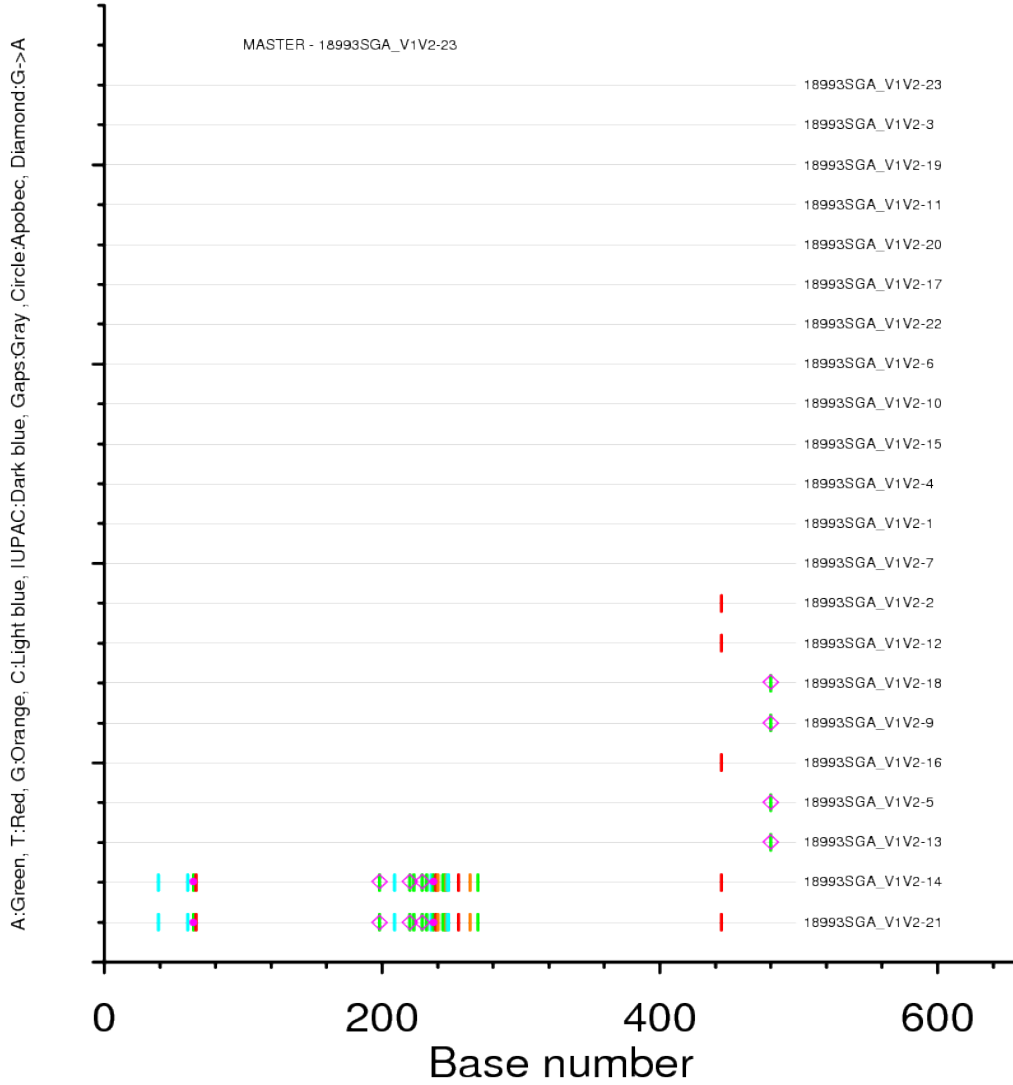

Transmitted viral variants=4
